# Supplementary material
Source: publisher figshare collection journal article supplement (https://acs.figshare.com/ndownloader/files/4571281)
Supplement: Supplementary file 1 [file 4571281]

**Supplementary Table S3.** Transcriptional Regulation of Genes Encoding Pathogenesis-Related (PR) Proteins, and Proteins Involved in Photosynthesis (PH) and Glycolysis (G)

| Code <sup>a</sup> | Microarray ID         | SGN-ID <sup>b</sup> | Annotation                                                          | Ratio <sup>c</sup><br>t=1h | Ratio <sup>c</sup><br>t=3h | Ratio <sup>c</sup><br>t=5h |
|-------------------|-----------------------|---------------------|---------------------------------------------------------------------|----------------------------|----------------------------|----------------------------|
| PR                | Les.4693.1.S1_at      | SGN-U314796         | Pathogenesis-related protein PR1a (P4) precursor                    | 5.06                       | 5.31                       | <b>36.04</b>               |
| PR                | LesAffx.10495.1.S1_at | SGN-U313773         | P69C protein                                                        | -1.17                      | 1.04                       | 1.36                       |
| PR                | Les.5611.1.S1_at      | SGN-U330434         | P69D protein                                                        | 1.12                       | 1.17                       | -1.11                      |
| PR                | LesAffx.5691.1.S1_at  | SGN-U314863         | Pathogenesis related protein isoform b1 precursor (Solanum phureja) | 1.46                       | 1.07                       | 1.34                       |
| PR                | Les.3408.1.S1_at      | SGN-U314797         | Pathogenesis-related leaf protein 6 precursor (P6)                  | 1.95                       | <b>2.24</b>                | <b>3.83</b>                |
| PR                | Les.3408.1.S2_at      | SGN-U314797         | Pathogenesis-related leaf protein 6 precursor (P6)                  | 1.17                       | 1.58                       | 3.31                       |
| PR                | Les.4496.1.S1_at      | SGN-U312368         | Pathogenesis-related protein 10 (Solanum virginianum)               | <b>1.94</b>                | 1.94                       | <b>2.85</b>                |
| PR                | Les.54.1.S1_at        | SGN-U315428         | Pathogenesis-related protein 1A1 precursor (PR-1A1)                 | -1.05                      | <b>1.81</b>                | 2.80                       |
| PR                | Les.4460.1.S1_at      | SGN-U316008         | Pathogenesis-related protein P2 precursor                           | 1.92                       | 3.09                       | <b>4.74</b>                |
| PR                | LesAffx.55504.1.S1_at | SGN-U327156         | Pathogenesis-related protein-like protein (Medicago truncatula)     | 1.24                       | -1.20                      | -3.09                      |
| PR                | Les.3648.1.S1_at      | SGN-U313772         | Subtilisin-like endoprotease (P69A protein)                         | -1.02                      | -1.12                      | -1.25                      |
| PR                | Les.3635.1.S1_at      | SGN-U313775         | Subtilisin-like protease (P69B protein)                             | 1.38                       | 1.60                       | <b>1.80</b>                |
| PR                | Les.1609.1.S1_at      | SGN-U315668         | Beta-1,3-endoglucanase 14 (Arabidopsis thaliana)                    | <b>-1.87</b>               | 1.29                       | 2.33                       |
| PR                | Les.1609.2.A1_at      | SGN-U315668         | Beta-1,3-endoglucanase 14 (Arabidopsis thaliana)                    | -1.01                      | 1.21                       | <b>3.12</b>                |
| PH                | Les.147.1.S1_at       | SGN-U312438         | Chlorophyll a,b binding protein type I (Solanum tuberosum)          | -1.15                      | -1.10                      | -1.35                      |
| PH                | Les.1603.1.A1_at      | SGN-U315963         | Chlorophyll a-b binding protein 8                                   | -1.07                      | -1.21                      | -1.58                      |
| PH                | Les.1736.1.A1_at      | SGN-U319612         | Putative chlorophyll A-B binding protein (Arabidopsis thaliana)     | -1.07                      | -1.04                      | -1.25                      |
| PH                | Les.2092.1.S1_at      | SGN-U312336         | Secretory peroxidase (Nicotiana tabacum)                            | -1.10                      | -1.74                      | <b>-2.22</b>               |
| PH                | Les.2092.2.S1_at      | SGN-U312336         | Secretory peroxidase (Nicotiana tabacum)                            | <b>-1.68</b>               | -3.69                      | -1.50                      |
| PH                | Les.2286.1.S1_at      | SGN-U312827         | Light-harvesting complex protein (Arabidopsis thaliana)             | 1.03                       | -1.09                      | -1.44                      |
| PH                | Les.233.1.S1_at       | SGN-U312436         | Chlorophyll a-b binding protein 4                                   | -1.02                      | -1.04                      | -1.10                      |
| PH                | Les.2478.1.S1_a_at    | SGN-U313214         | Chlorophyll a-b binding protein 3C-like (Solanum tuberosum)         | -1.02                      | -1.03                      | -1.13                      |
| PH                | Les.2478.1.S1_at      | SGN-U313214         | Chlorophyll a-b binding protein 3C-like (Solanum tuberosum)         | 1.00                       | -1.07                      | -1.09                      |
| PH                | Les.2924.1.S1_at      | SGN-U313159         | Sulfur (Nicotiana tabacum)                                          | -1.07                      | -1.06                      | -1.34                      |
| PH                | Les.3016.1.S1_at      | SGN-U314750         | Chlorophyll a-b binding protein 12                                  | -1.09                      | 1.05                       | -1.44                      |
| PH                | Les.3054.1.S1_at      | SGN-U314748         | Chlorophyll a-b binding protein 13                                  | -1.00                      | -1.06                      | -1.16                      |
| PH                | Les.3062.1.S1_at      | SGN-U312661         | Chloroplast pigment-binding protein CP29 (Nicotiana tabacum)        | -1.12                      | -1.04                      | -1.29                      |
| PH                | Les.3062.2.S1_at      | SGN-U312661         | Chloroplast pigment-binding protein CP29 (Nicotiana tabacum)        | 1.13                       | -3.83                      | 1.38                       |
| PH                | Les.3073.1.S1_at      | SGN-U312967         | Photosystem II 22 kDa protein                                       | -1.03                      | -1.09                      | -1.21                      |
| PH                | Les.3123.1.S1_at      | SGN-U334377         | Geranylgeranyl reductase (Nicotiana tabacum)                        | -1.20                      | -1.03                      | -1.62                      |
| PH                | Les.3297.1.S1_at      | SGN-U312593         | Chlorophyll a/b-binding protein (cab-11)                            | -1.08                      | -1.06                      | -1.38                      |
| PH                | Les.3297.2.S1_at      | SGN-U312593         | Chlorophyll a/b-binding protein (cab-11)                            | 1.42                       | -4.81                      | 1.52                       |
| PH                | Les.3775.1.S1_at      | SGN-U312713         | Chlorophyll a-b binding protein 6A                                  | -1.05                      | -1.11                      | -1.24                      |
| PH                | Les.4083.1.S1_at      | SGN-U312663         | Chlorophyll a-b binding protein 7                                   | -1.02                      | -1.15                      | -1.22                      |
| PH                | Les.4259.1.S1_at      | SGN-U312843         | Chlorophyll a-b binding protein 8                                   | -1.11                      | -1.17                      | -1.54                      |

Supplementary Table 3, Continued

| Code <sup>a</sup> | Microarray ID         | SGN-ID <sup>b</sup> | Annotation                                                      | Ratio <sup>c</sup><br>t=1h | Ratio <sup>c</sup><br>t=3h | Ratio <sup>c</sup><br>t=5h |
|-------------------|-----------------------|---------------------|-----------------------------------------------------------------|----------------------------|----------------------------|----------------------------|
| PH                | Les.4345.2.A1_a_at    | SGN-U313217         | Chlorophyll a-b binding protein 1B                              | -1.10                      | -1.10                      | -1.18                      |
| PH                | Les.4345.2.A1_x_at    | SGN-U313217         | Chlorophyll a-b binding protein 1B                              | -1.12                      | -1.10                      | -1.25                      |
| PH                | Les.4345.3.S1_x_at    | SGN-U313211         | Chlorophyll a-b binding protein 1B                              | -1.06                      | -1.09                      | -1.13                      |
| PH                | Les.4345.4.A1_at      | SGN-U313211         | Chlorophyll a-b binding protein 1B                              | 1.03                       | -1.18                      | -1.18                      |
| PH                | Les.4345.4.A1_x_at    | SGN-U313211         | Chlorophyll a-b binding protein 1B                              | 1.03                       | -1.11                      | -1.17                      |
| PH                | Les.4359.1.S1_at      | SGN-U313221         | Chlorophyll a-b binding protein 3C                              | -1.11                      | 1.22                       | 1.49                       |
| PH                | Les.4359.2.A1_at      | SGN-U313221         | Chlorophyll a-b binding protein 3C                              | 1.03                       | 1.33                       | 2.15                       |
| PH                | Les.4492.1.S1_at      | SGN-U312334         | Chlorophyll a-b binding protein CP24 10A                        | -1.34                      | -5.81                      | 1.17                       |
| PH                | Les.4492.2.S1_at      | SGN-U312334         | Chlorophyll a-b binding protein CP24 10A                        | -1.08                      | -1.07                      | -1.43                      |
| PH                | Les.4492.3.S1_at      | SGN-U312336         | Secretory peroxidase (Nicotiana tabacum)                        | -1.10                      | -1.04                      | -1.53                      |
| PH                | Les.608.1.S1_at       | SGN-U312449         | Type I (26 kD) CP29 polypeptide                                 | -1.08                      | -1.11                      | -1.35                      |
| PH                | LesAffx.41489.1.S1_at | SGN-U321924         | Hypothetical protein                                            | -1.26                      | -1.09                      | -1.02                      |
| PH                | LesAffx.57669.1.S1_at | SGN-U319612         | Putative chlorophyll A-B binding protein (Arabidopsis thaliana) | -1.33                      | 1.10                       | -1.52                      |
| PH                | Les.4228.1.A1_at      | SGN-U314594         | Chloroplast photosystem I reaction center V                     | 1.06                       | -1.10                      | -1.05                      |
| PH                | Les.4228.3.S1_at      | SGN-U314594         | Chloroplast photosystem I reaction center V                     | 1.01                       | -1.09                      | -1.10                      |
| PH                | Les.1305.1.A1_at      | SGN-U315765         | Ultraviolet-B-repressible protein (Gossypium hirsutum)          | 1.10                       | 1.15                       | -1.04                      |
| PH                | Les.2377.1.S1_at      | SGN-U314018         | Ultraviolet-B-repressible protein (Gossypium hirsutum)          | -1.02                      | -1.03                      | -1.39                      |
| PH                | Les.2377.2.A1_at      | SGN-U314018         | Ultraviolet-B-repressible protein (Gossypium hirsutum)          | 1.05                       | -1.06                      | -1.22                      |
| PH                | Les.5812.1.S1_at      | SGN-U315764         | Ultraviolet-B-repressible protein (Gossypium hirsutum)          | 1.04                       | 1.08                       | -1.13                      |
| PH                | Les.1290.1.A1_at      | SGN-U314676         | Photosystem II 10 kDa polypeptide (Solanum tuberosum)           | 1.41                       | -1.00                      | 1.00                       |
| PH                | Les.3099.1.S1_at      | SGN-U312648         | Photosystem I subunit XI (Nicotiana attenuata)                  | -1.06                      | -1.05                      | -1.11                      |
| PH                | Les.324.1.S1_at       | SGN-U314260         | Putative photosystem I subunit III (Nicotiana tabacum)          | -1.11                      | -1.08                      | -1.22                      |
| PH                | Les.867.1.S1_at       | SGN-U312640         | Photosystem I reaction center subunit II (Solanum lycopersicum) | -1.03                      | 1.01                       | -1.19                      |
| PH                | LesAffx.482.1.S1_at   | SGN-U345822         | Photosystem I assembly protein ycf4 (Solanum tuberosum)         | <b>1.46</b>                | -1.10                      | -1.38                      |
| PH                | Les.2168.1.S1_at      | SGN-U313179         | Photosystem I reaction centre subunit N (Medicago truncatula)   | 1.01                       | 1.06                       | -1.25                      |
| PH                | Les.3175.1.S1_at      | SGN-U313090         | Putative desaturase-like protein (Trifolium repens)             | -1.06                      | -1.13                      | -1.25                      |
| PH                | Les.1472.1.S1_at      | SGN-U312871         | Photosystem II oxygen-evolving complex protein 3 precursor      | -1.03                      | -1.04                      | -1.15                      |
| PH                | Les.3029.1.S1_at      | SGN-U312532         | Oxygen-evolving enhancer protein 1                              | -1.06                      | -1.14                      | -1.22                      |
| PH                | Les.4007.1.S1_at      | SGN-U312531         | Oxygen-evolving enhancer protein 1                              | -1.02                      | -1.04                      | -1.36                      |
| PH                | Les.482.1.S1_at       | SGN-U312572         | Oxygen-evolving enhancer protein 2                              | -1.01                      | -1.04                      | -1.13                      |
| PH                | Les.5738.1.S1_at      | SGN-U317040         | Oxygen evolving complex protein-like (Oryza sativa)             | -1.10                      | -1.08                      | -1.35                      |
| PH                | Les.626.1.S1_at       | SGN-U318866         | putative PsbP domain protein (Arabidopsis thaliana)             | 1.15                       | 1.19                       | -1.11                      |
| PH                | Les.626.2.S1_at       | SGN-U318866         | putative PsbP domain protein (Arabidopsis thaliana)             | 1.09                       | 1.17                       | -1.38                      |
| PH                | Les.626.3.S1_at       | SGN-U318866         | putative PsbP domain protein (Arabidopsis thaliana)             | 1.05                       | 1.20                       | -1.15                      |

Supplementary Table 3, Continued

| Code <sup>a</sup> | Microarray ID         | SGN-ID <sup>b</sup> | Annotation                                                      | Ratio <sup>c</sup><br>t=1h | Ratio <sup>c</sup><br>t=3h | Ratio <sup>c</sup><br>t=5h |
|-------------------|-----------------------|---------------------|-----------------------------------------------------------------|----------------------------|----------------------------|----------------------------|
| PH                | LesAffx.48402.1.A1_at | SGN-U323580         | Thylakoid lumenal 21.5 kDa protein (Arabidopsis thaliana)       | -1.15                      | -1.23                      | -1.08                      |
| PH                | LesAffx.48402.1.S1_at | SGN-U323580         | Thylakoid lumenal 21.5 kDa protein (Arabidopsis thaliana)       | -1.05                      | 1.04                       | -1.45                      |
| PH                | LesAffx.67937.1.S1_at | SGN-U326478         | Hypothetical protein (Arabidopsis thaliana)                     | -1.20                      | -1.24                      | -1.52                      |
| PH                | LesAffx.51226.1.A1_at | SGN-U342407         | Apocytochrome f precursor (Solanum tuberosum)                   | <b>2.32</b>                | 1.11                       | 1.06                       |
| PH                | LesAffx.51226.1.S1_at | SGN-U342407         | Apocytochrome f precursor (Solanum tuberosum)                   | 2.12                       | -1.13                      | 1.08                       |
| PH                | LesAffx.66410.1.S1_at | SGN-U343039         | Photosystem II CP43-chlorophyll (Populus trichocarpa)           | -1.34                      | -1.02                      | -1.72                      |
| PH                | Les.3011.1.S1_at      | SGN-U314192         | NADPH:protochlorophyllide oxidoreductase (Nicotiana tabacum)    | -1.29                      | -1.43                      | -2.05                      |
| PH                | Les.5120.1.S1_at      | SGN-U313279         | NADPH:protochlorophyllide oxidoreductase (Nicotiana tabacum)    | -1.21                      | -1.20                      | -1.89                      |
| PH                | Les.5850.1.S1_at      | SGN-U313280         | NADPH:protochlorophyllide oxidoreductase (Nicotiana tabacum)    | -1.37                      | -1.24                      | -1.89                      |
| G                 | LesAffx.71366.1.S1_at | SGN-U322121         | Hypothetical protein (Arabidopsis thaliana)                     | -1.20                      | -1.07                      | 1.13                       |
| G                 | Les.3182.1.S1_at      | SGN-U312518         | Hypothetical protein (Solanum tuberosum)                        | -1.08                      | -1.05                      | -1.27                      |
| G                 | Les.4336.1.S1_at      | SGN-U313176         | Phosphoglycerate kinase (Solanum tuberosum)                     | -1.36                      | -1.10                      | -1.44                      |
| G                 | Les.4336.2.A1_at      | SGN-U313176         | Phosphoglycerate kinase (Solanum tuberosum)                     | -1.02                      | -1.11                      | -1.23                      |
| G                 | Les.4336.3.S1_at      | SGN-U313176         | Phosphoglycerate kinase (Solanum tuberosum)                     | -1.16                      | -1.05                      | -1.30                      |
| G                 | Les.1829.1.S1_at      | SGN-U314788         | Putative plastidic aldolase (Oryza sativa subsp. japonica)      | -1.03                      | -1.09                      | 1.27                       |
| G                 | Les.246.1.S1_at       | SGN-U314331         | Fructose-bisphosphate aldolase-like protein (Solanum tuberosum) | 1.17                       | 1.04                       | 1.09                       |
| G                 | Les.3060.1.S1_at      | SGN-U312609         | Plastidic aldolase NPALDP1 (Nicotiana paniculata)               | -1.04                      | -1.11                      | -1.14                      |
| G                 | Les.3174.1.S1_at      | SGN-U312608         | Plastidic aldolase NPALDP1 (Nicotiana paniculata)               | -1.16                      | -1.18                      | -1.26                      |
| G                 | Les.4275.1.S1_at      | SGN-U312344         | Plastidic aldolase (Nicotiana paniculata)                       | -1.05                      | -1.14                      | -1.13                      |
| G                 | Les.5598.1.S1_at      | SGN-U314332         | Fructose-bisphosphate aldolase-like (Solanum tuberosum)         | -1.04                      | -1.03                      | 1.13                       |
| G                 | Les.3516.1.S1_at      | SGN-U316705         | Hexokinase                                                      | 1.08                       | 1.10                       | 1.13                       |
| G                 | Les.3815.1.S1_at      | SGN-U335794         | Hexokinase                                                      | -1.25                      | -1.05                      | 1.00                       |
| G                 | Les.1509.1.S1_at      | SGN-U313534         | Pyruvate kinase isozyme A (Nicotiana tabacum)                   | -1.08                      | -1.23                      | -1.23                      |
| G                 | Les.2323.1.S1_at      | SGN-U313639         | Putative pyruvate kinase (Arabidopsis thaliana)                 | 1.00                       | -1.05                      | 1.08                       |
| G                 | Les.3129.1.S1_at      | SGN-U314040         | Pyruvate kinase, cytosolic isozyme (Solanum tuberosum)          | -1.14                      | -1.16                      | -1.32                      |
| G                 | Les.3129.2.S1_at      | SGN-U314040         | Pyruvate kinase, cytosolic isozyme (Solanum tuberosum)          | -1.34                      | -1.18                      | <b>-1.71</b>               |
| G                 | Les.4288.1.S1_at      | SGN-U334503         | Pyruvate kinase family protein (Oryza sativa subsp. japonica)   | -1.27                      | -2.78                      | -1.82                      |
| G                 | Les.4562.1.S1_at      | SGN-U312582         | Pyruvate kinase (Arabidopsis thaliana)                          | -1.03                      | -1.27                      | -1.09                      |
| G                 | Les.5326.1.S1_at      | SGN-U313540         | Putative pyruvate kinase (Oryza sativa subsp. japonica)         | 1.09                       | -1.36                      | 1.06                       |
| G                 | Les.5649.1.A1_at      | SGN-U320512         | Pyruvate kinase (Nicotiana tabacum)                             | -1.04                      | -1.46                      | -1.12                      |
| G                 | Les.5649.1.S1_at      | SGN-U320512         | Pyruvate kinase (Nicotiana tabacum)                             | -1.41                      | -1.34                      | -1.31                      |
| G                 | LesAffx.61184.1.S1_at | SGN-U313534         | Pyruvate kinase isozyme A (Nicotiana tabacum)                   | -1.29                      | -1.14                      | -1.51                      |
| G                 | LesAffx.66367.1.S1_at | SGN-U320005         | Pyruvate kinase, cytosolic isozyme (Nicotiana tabacum)          | -1.16                      | -1.15                      | -1.41                      |
| G                 | Les.186.1.S1_at       | SGN-U315933         | Glyceraldehyde-3-phosphate dehydrogenase (Nicotiana tabacum)    | -1.30                      | -1.21                      | -1.26                      |
| G                 | Les.262.1.S1_at       | SGN-U314312         | Glyceraldehyde 3-phosphate dehydrogenase (Solanum tuberosum)    | -1.11                      | 1.01                       | 1.13                       |

Supplementary Table 3, Continued

| Code <sup>a</sup> | Microarray ID         | SGN-ID <sup>b</sup> | Annotation                                                                                 | Ratio <sup>c</sup><br>t=1h | Ratio <sup>c</sup><br>t=3h | Ratio <sup>c</sup><br>t=5h |
|-------------------|-----------------------|---------------------|--------------------------------------------------------------------------------------------|----------------------------|----------------------------|----------------------------|
| G                 | Les.2888.1.S1_at      | SGN-U312461         | Glyceraldehyde-3-phosphate dehydrogenase A (Nicotiana tabacum)                             | -1.10                      | -1.00                      | -1.32                      |
| G                 | Les.2933.1.S1_at      | SGN-U312804         | Glyceraldehyde-3-phosphate dehydrogenase B subunit (Glycine max)                           | -1.11                      | -1.15                      | -1.34                      |
| G                 | Les.3072.1.S1_at      | SGN-U312459         | Glyceraldehyde-3-phosphate dehydrogenase A (Nicotiana tabacum)                             | -1.15                      | -1.15                      | -1.50                      |
| G                 | Les.3072.2.S1_at      | SGN-U312459         | Glyceraldehyde-3-phosphate dehydrogenase A (Nicotiana tabacum)                             | -1.43                      | -1.14                      | -2.08                      |
| G                 | Les.3072.3.S1_at      | SGN-U312459         | Glyceraldehyde-3-phosphate dehydrogenase A (Nicotiana tabacum)                             | -1.28                      | -1.19                      | -1.94                      |
| G                 | Les.3242.1.A1_at      | SGN-U312802         | Glyceraldehyde-3-phosphate dehydrogenase B subunit (Glycine max)                           | -1.07                      | -1.19                      | -1.40                      |
| G                 | Les.3242.2.S1_at      | SGN-U312802         | Glyceraldehyde-3-phosphate dehydrogenase B subunit (Glycine max)                           | -1.34                      | -1.14                      | -1.89                      |
| G                 | Les.3242.3.S1_at      | SGN-U312802         | Glyceraldehyde-3-phosphate dehydrogenase B subunit (Glycine max)                           | -1.23                      | -1.13                      | -1.85                      |
| G                 | Les.4797.1.S1_at      | SGN-U317897         | Glucose-6-phosphate isomerase                                                              | -1.17                      | -1.23                      | -1.53                      |
| G                 | LesAffx.2135.1.S1_at  | SGN-U315951         | Glucose-6-phosphate isomerase                                                              | -1.33                      | 1.05                       | -1.81                      |
| G                 | LesAffx.2135.3.S1_at  | SGN-U315951         | Glucose-6-phosphate isomerase                                                              | -1.07                      | -1.08                      | -1.26                      |
| G                 | LesAffx.2135.4.S1_at  | SGN-U315951         | Glucose-6-phosphate isomerase                                                              | -1.43                      | -1.01                      | -1.67                      |
| G                 | Les.2900.1.S1_at      | SGN-U315352         | Pyrophosphate--fructose 6-phosphate 1-phosphotransferase subunit beta (Solanum tuberosum)  | -1.06                      | -1.37                      | -1.25                      |
| G                 | LesAffx.51723.1.S1_at | SGN-U320209         | Phosphofructokinase, putative (Phosphofructokinase) (Medicago truncatula)                  | -1.65                      | -1.53                      | -1.10                      |
| G                 | LesAffx.62009.1.S1_at | SGN-U318557         | Putative pyrophosphate-fructose-6-phosphate 1-phosphotransferase (Arabidopsis thaliana)    | -1.72                      | -1.01                      | -1.15                      |
| G                 | LesAffx.68197.1.S1_at | SGN-U314840         | Pyrophosphate--fructose 6-phosphate 1-phosphotransferase alpha subunit (Solanum tuberosum) | -1.15                      | -1.11                      | -1.46                      |
| G                 | Les.303.1.S1_at       | SGN-U312379         | Enolase                                                                                    | -1.07                      | -1.08                      | -1.03                      |
| G                 | Les.3932.1.S1_at      | SGN-U312378         | Enolase                                                                                    | -1.64                      | 1.05                       | -1.31                      |
| G                 | Les.3932.2.S1_at      | SGN-U312378         | Enolase                                                                                    | <b>-1.66</b>               | 1.04                       | -1.48                      |
| G                 | Les.3932.3.S1_at      | SGN-U312378         | Enolase                                                                                    | -1.13                      | 1.08                       | -1.07                      |
| G                 | Les.5741.1.S1_at      | SGN-U318766         | Putative enolase (Arabidopsis thaliana)                                                    | -1.16                      | -1.12                      | 1.25                       |
| G                 | Les.96.1.A1_at        | SGN-U327280         | L-lactate dehydrogenase                                                                    | -1.01                      | 1.41                       | <b>4.55</b>                |
| G                 | Les.97.1.S1_at        | SGN-U326680         | L-lactate dehydrogenase                                                                    | 1.04                       | <b>1.96</b>                | <b>3.58</b>                |
| G                 | Les.4801.1.S1_at      | SGN-U316396         | Pyruvate dehydrogenase complex E2 subunit 1 (Arabidopsis thaliana)                         | -1.19                      | 1.01                       | 1.05                       |
| G                 | LesAffx.3802.1.S1_at  | SGN-U316577         | Dihydrolipoamide succinyltransferase (Medicago truncatula)                                 | <b>-1.66</b>               | -1.23                      | -1.47                      |
| G                 | LesAffx.3802.2.S1_at  | SGN-U316577         | Dihydrolipoamide succinyltransferase (Medicago truncatula)                                 | -1.51                      | 1.02                       | -1.28                      |

<sup>a</sup> Proteins encoded by genes indicated with PH (photosynthesis) or G (glycolysis) are functionally related to these processes according to the Biological Process GO annotation. <sup>b</sup> Gene identifier from the *Solanaceae* Genomics Network. <sup>c</sup> The values shown in bold indicate significantly different gene expression between the Cf-4/Avr4 and control seedlings ( $P \leq 0.01$ ). Ratios were used for the expression profiles presented in Figure 5.
